# Supplementary material
Source: PubMed Central journal article supplement (PMC6558663)

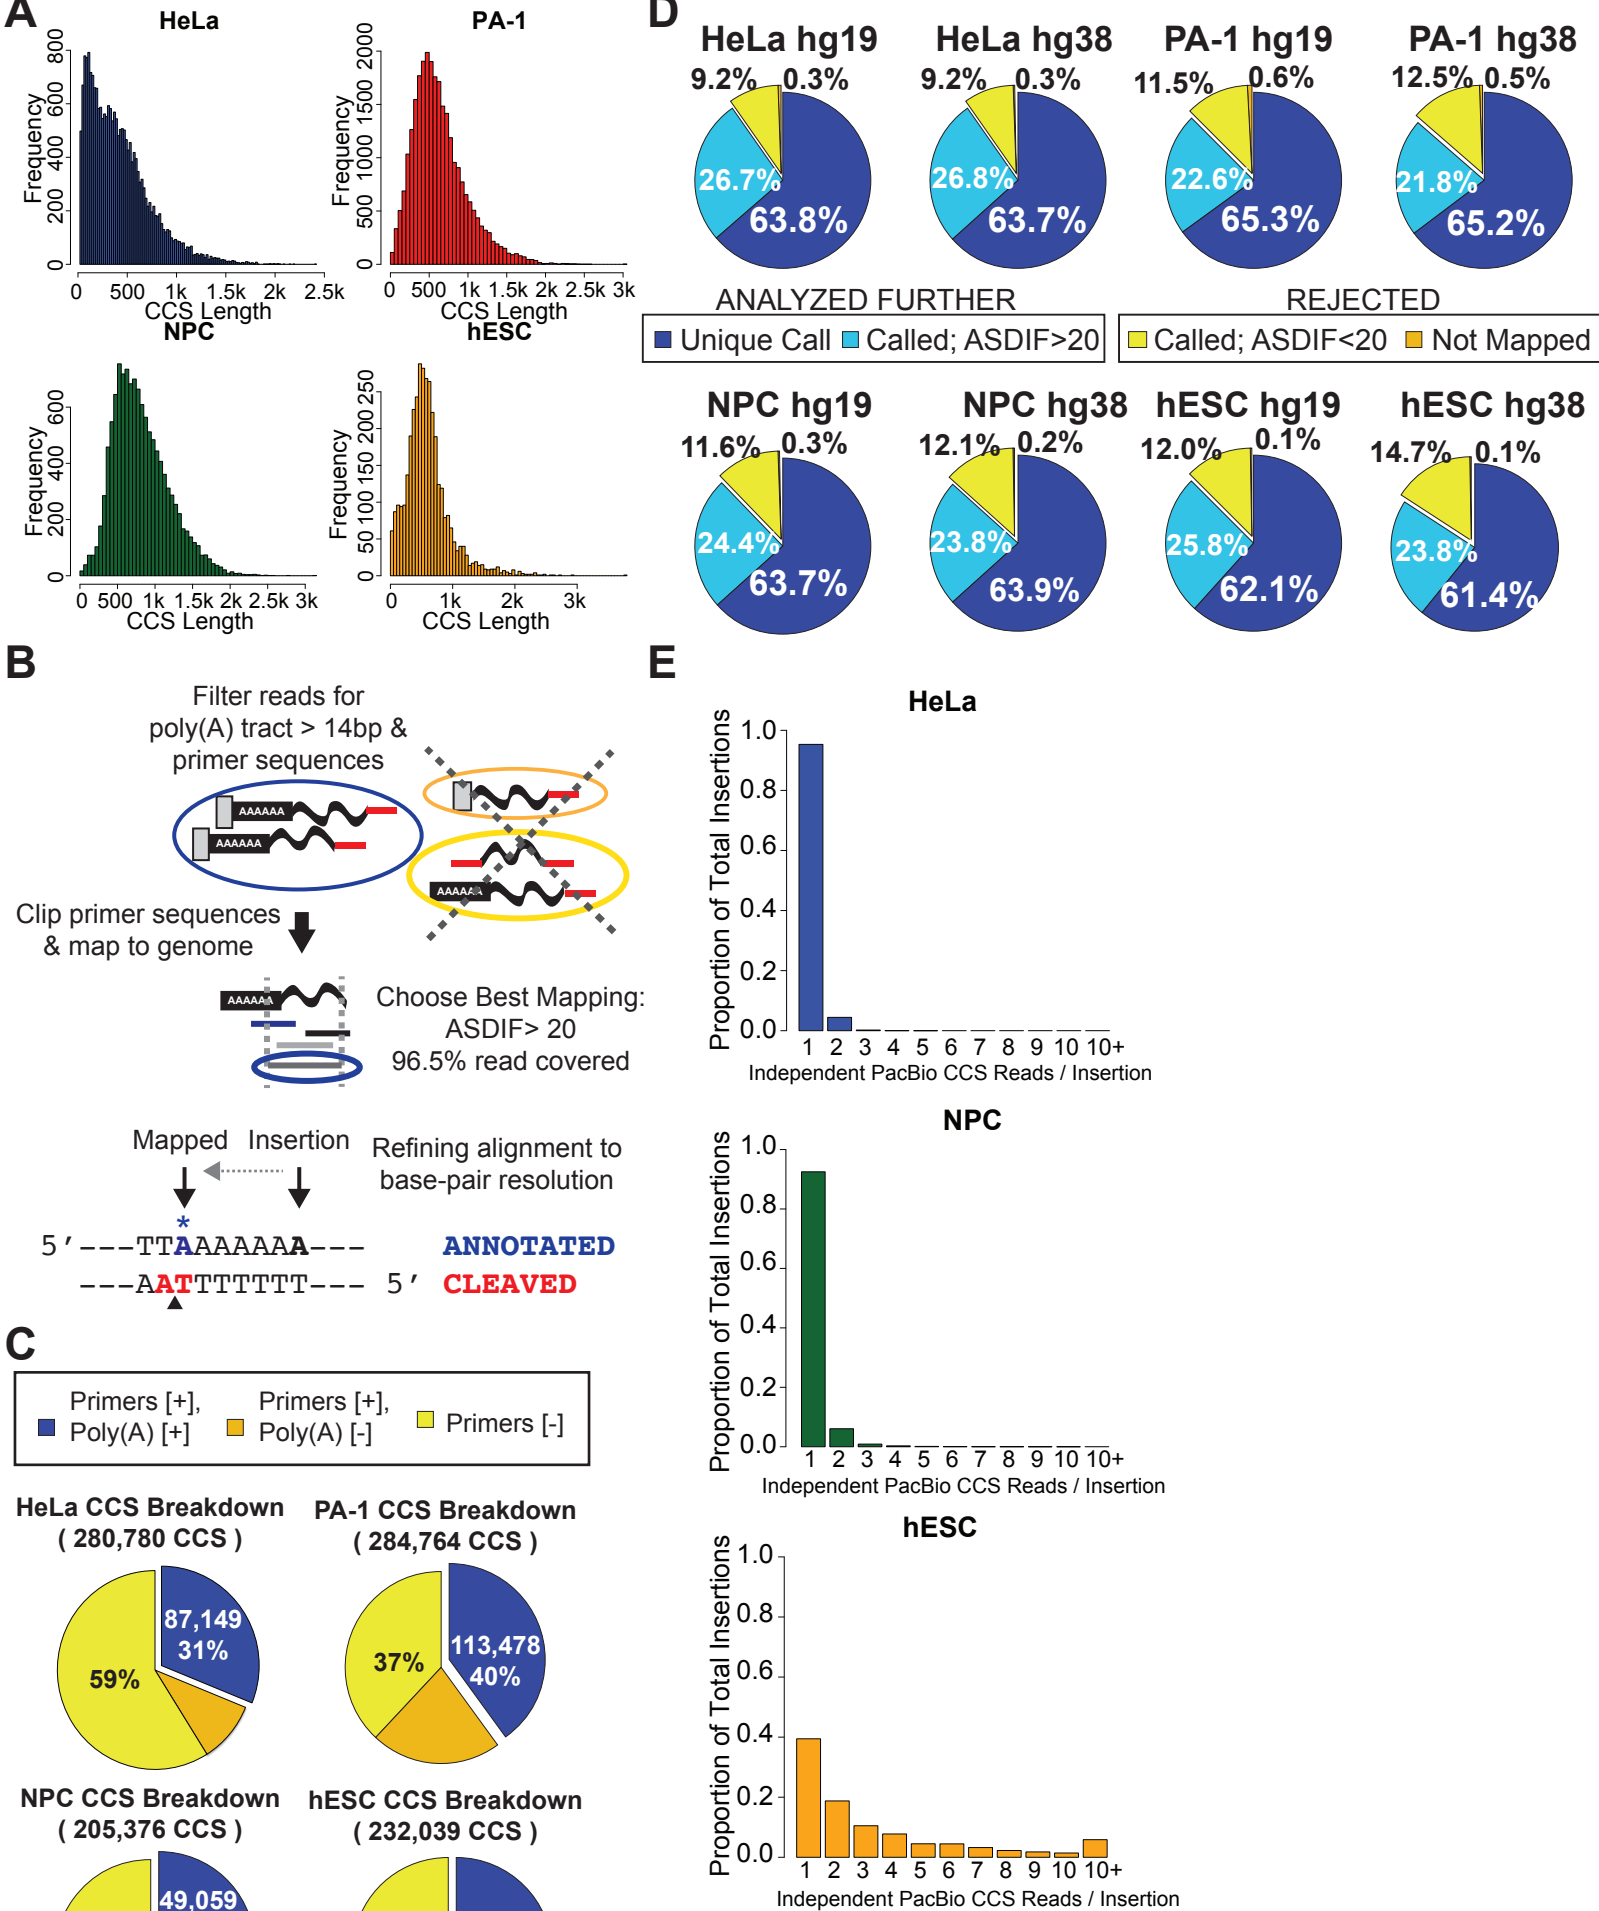

Figure S1

Supplement: NIHMS1523125-supplement-1.pdf [file NIHMS1523125-supplement-1.pdf]

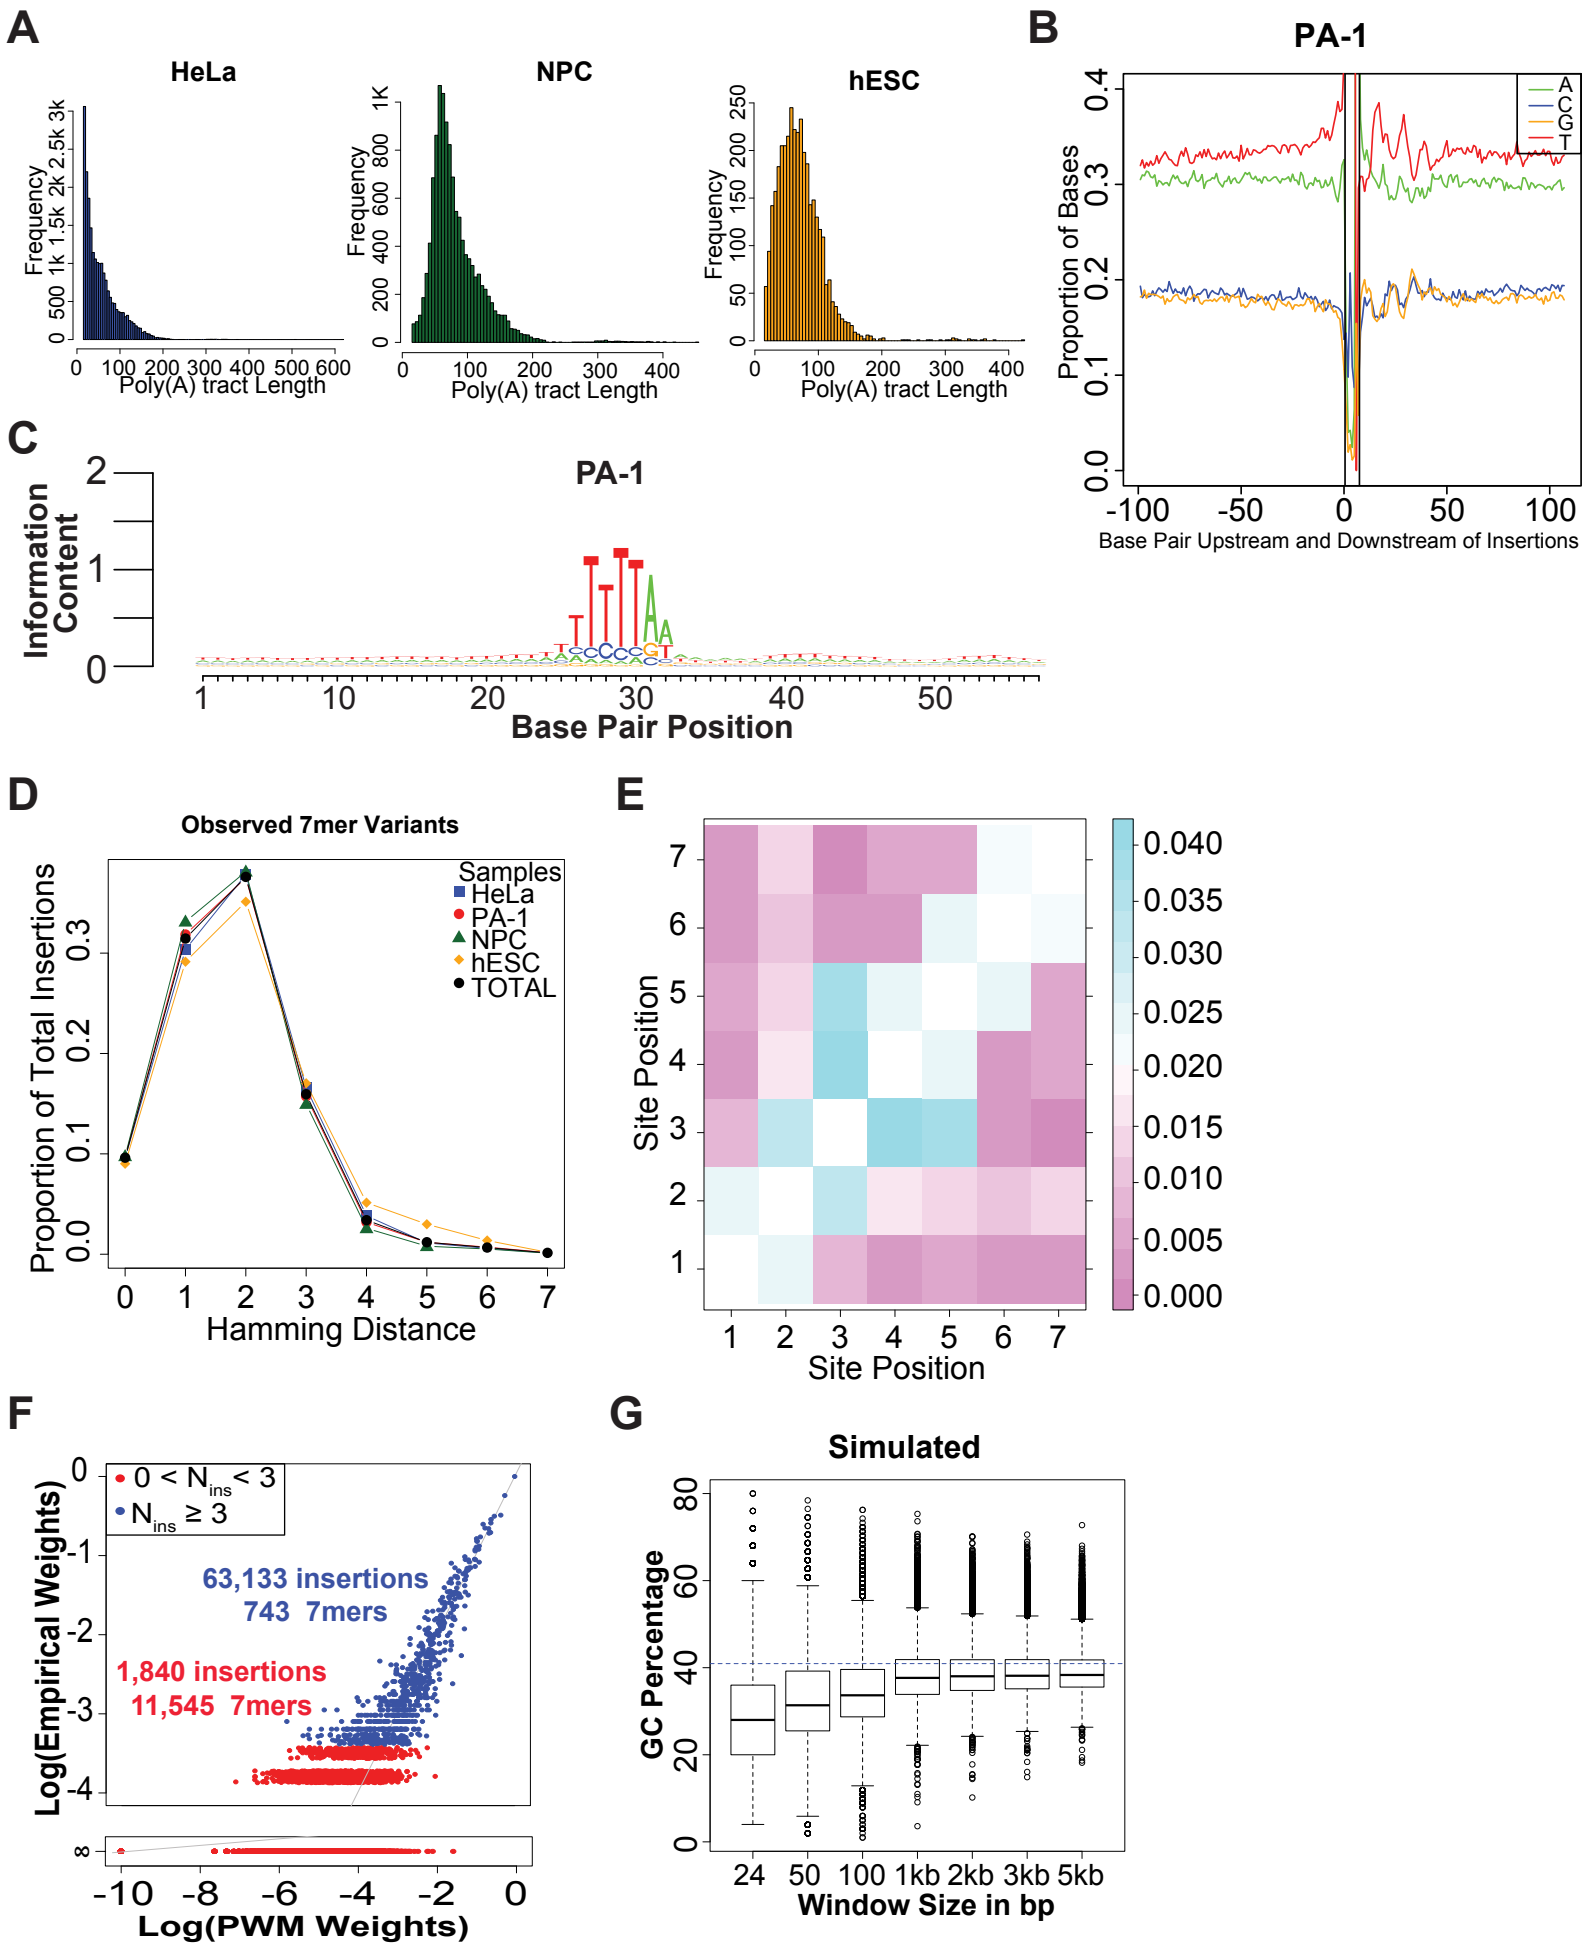

Figure S2

Supplement: NIHMS1523125-supplement-2.pdf [file NIHMS1523125-supplement-2.pdf]

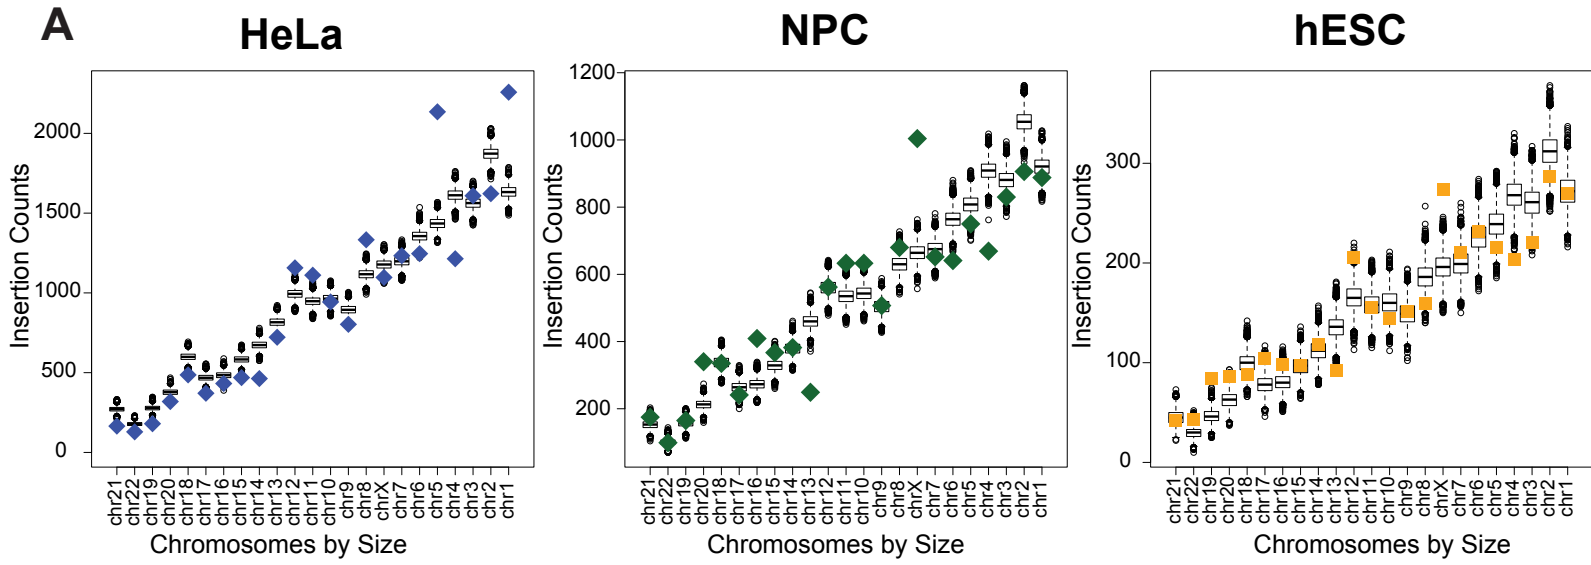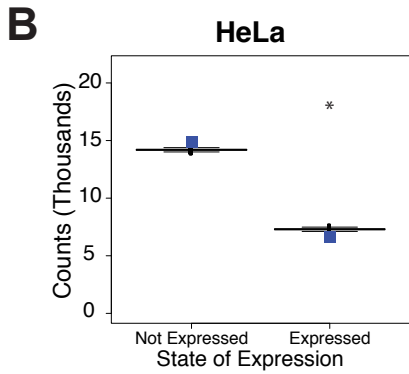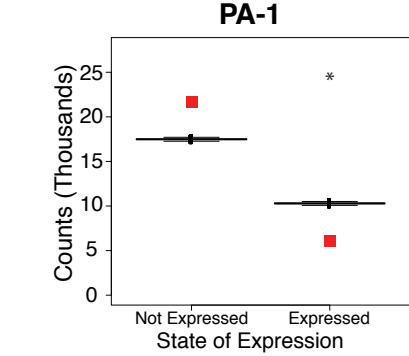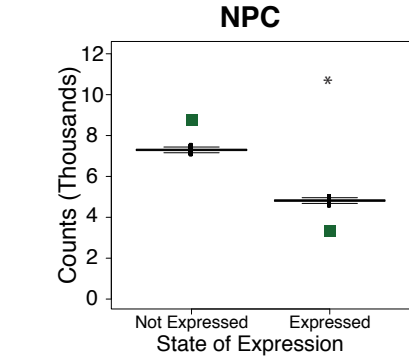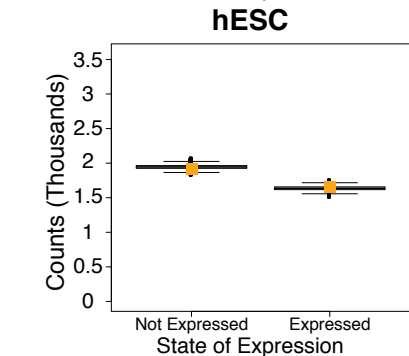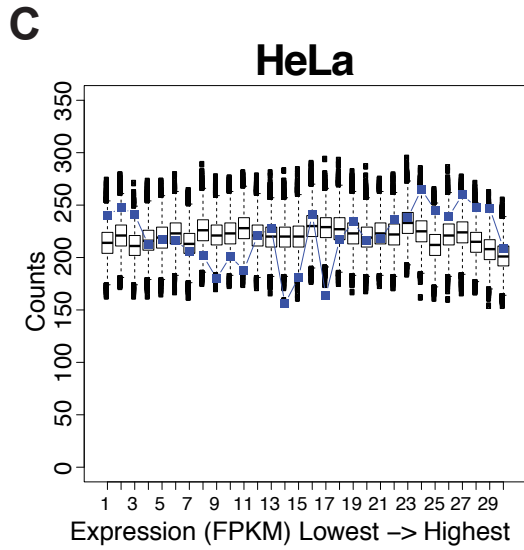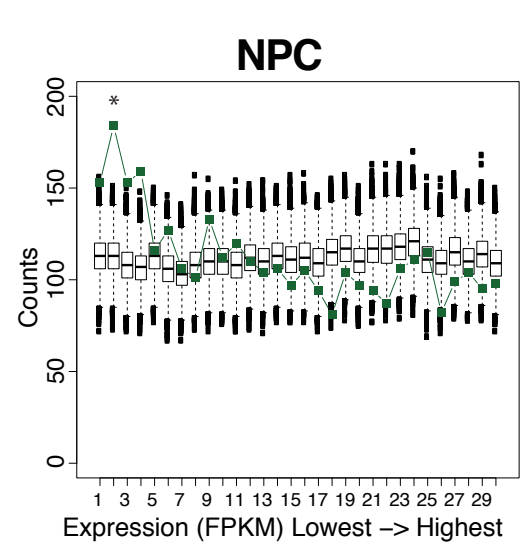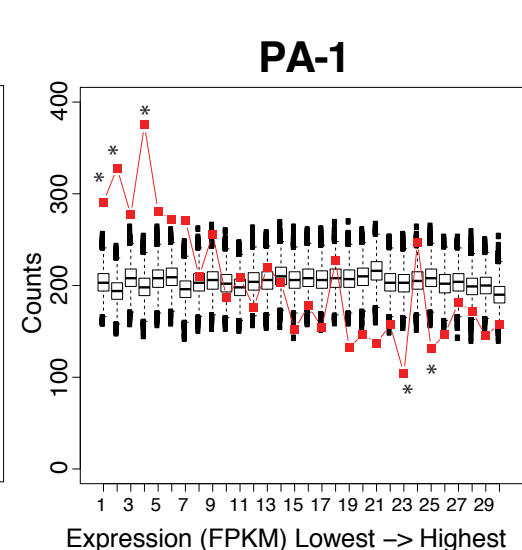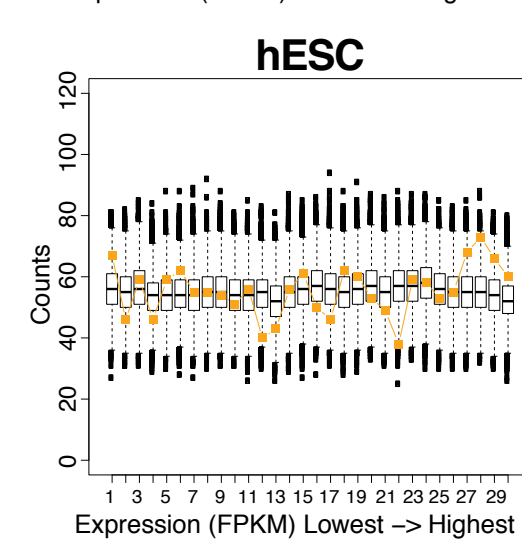

**Figure S3**

Supplement: NIHMS1523125-supplement-3.pdf [file NIHMS1523125-supplement-3.pdf]

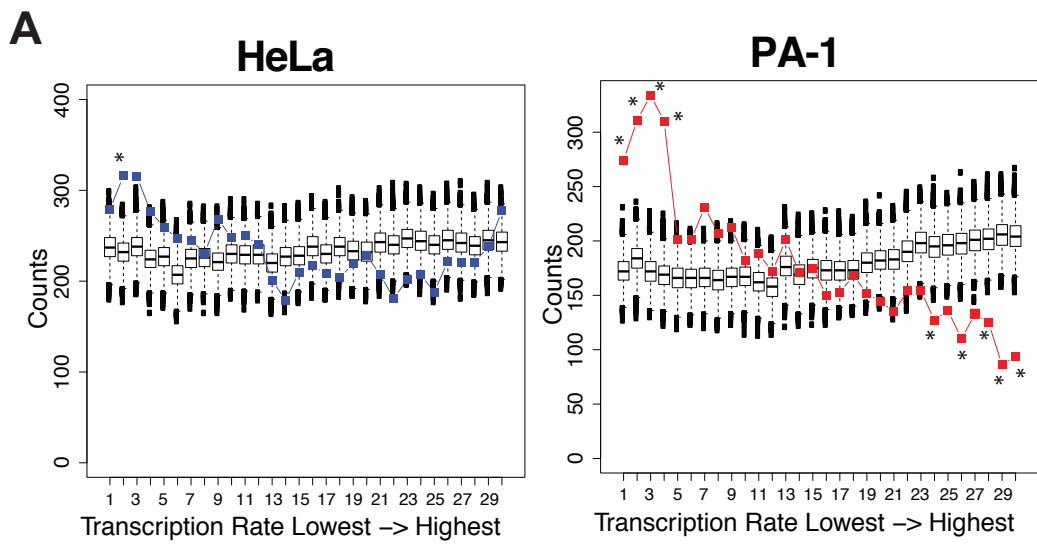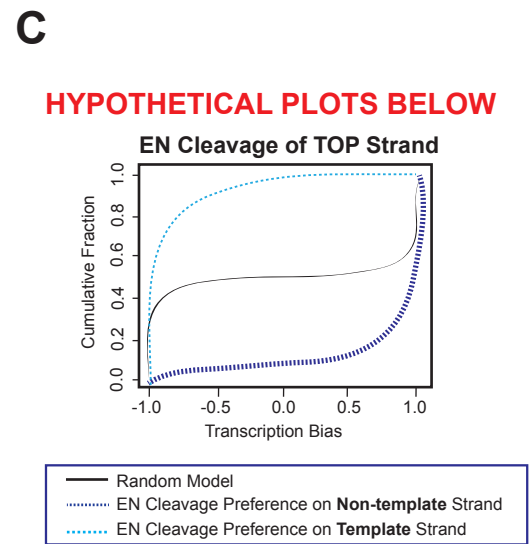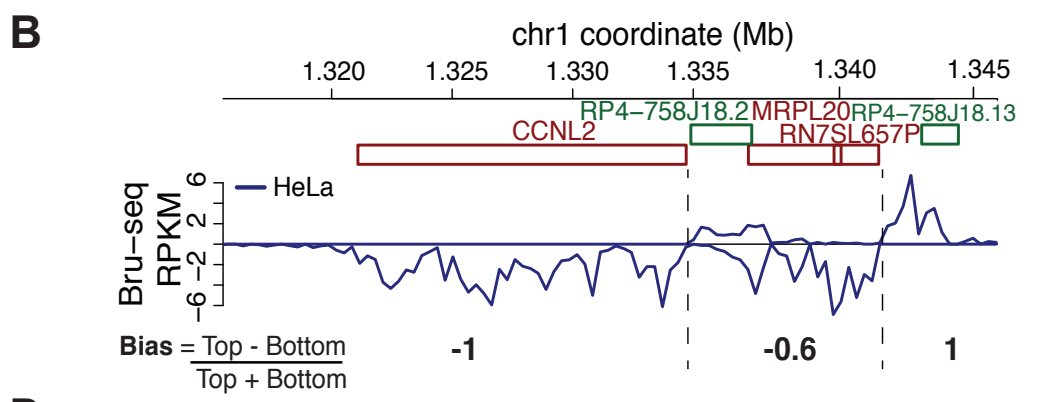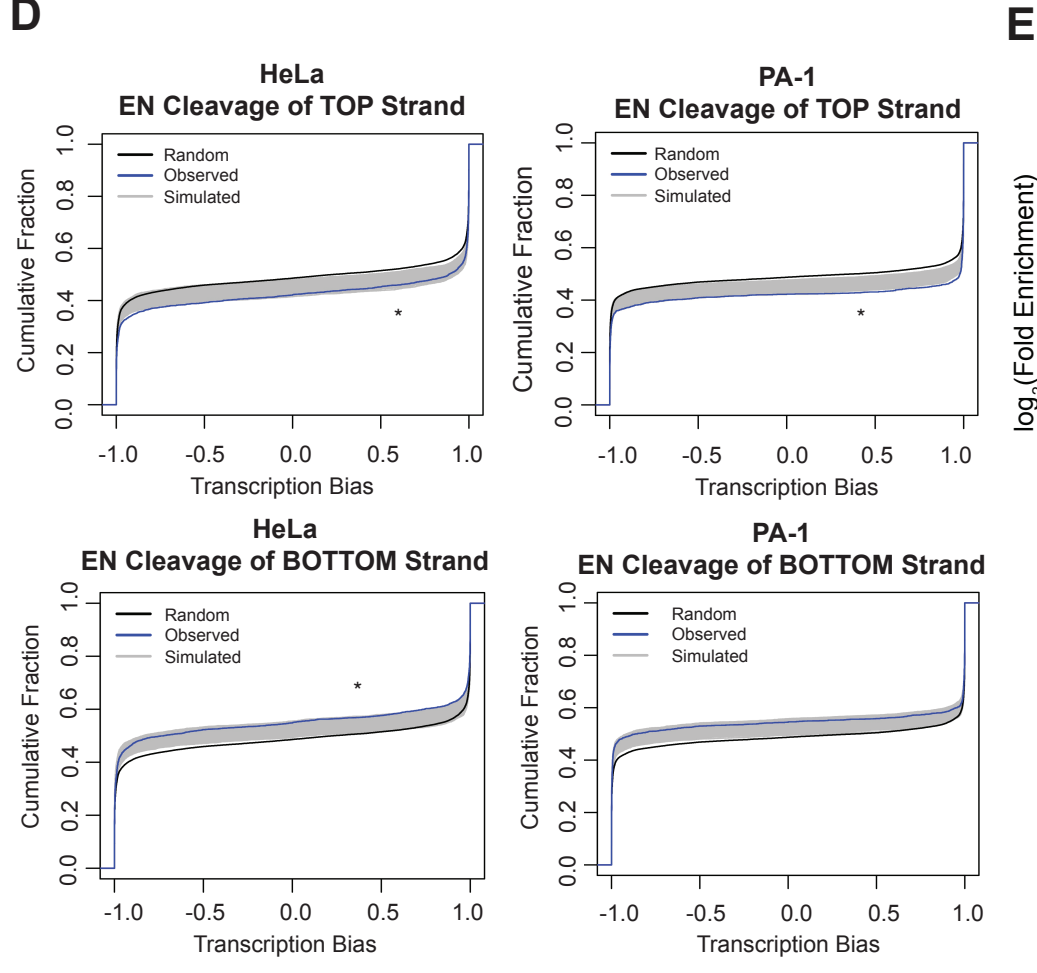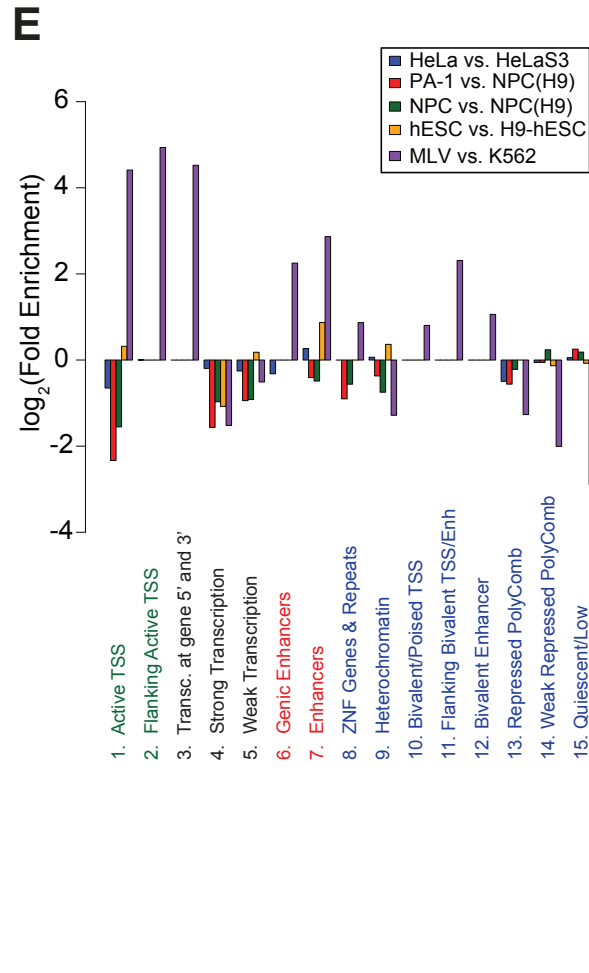

**Figure S4**

Supplement: NIHMS1523125-supplement-4.pdf [file NIHMS1523125-supplement-4.pdf]

**A**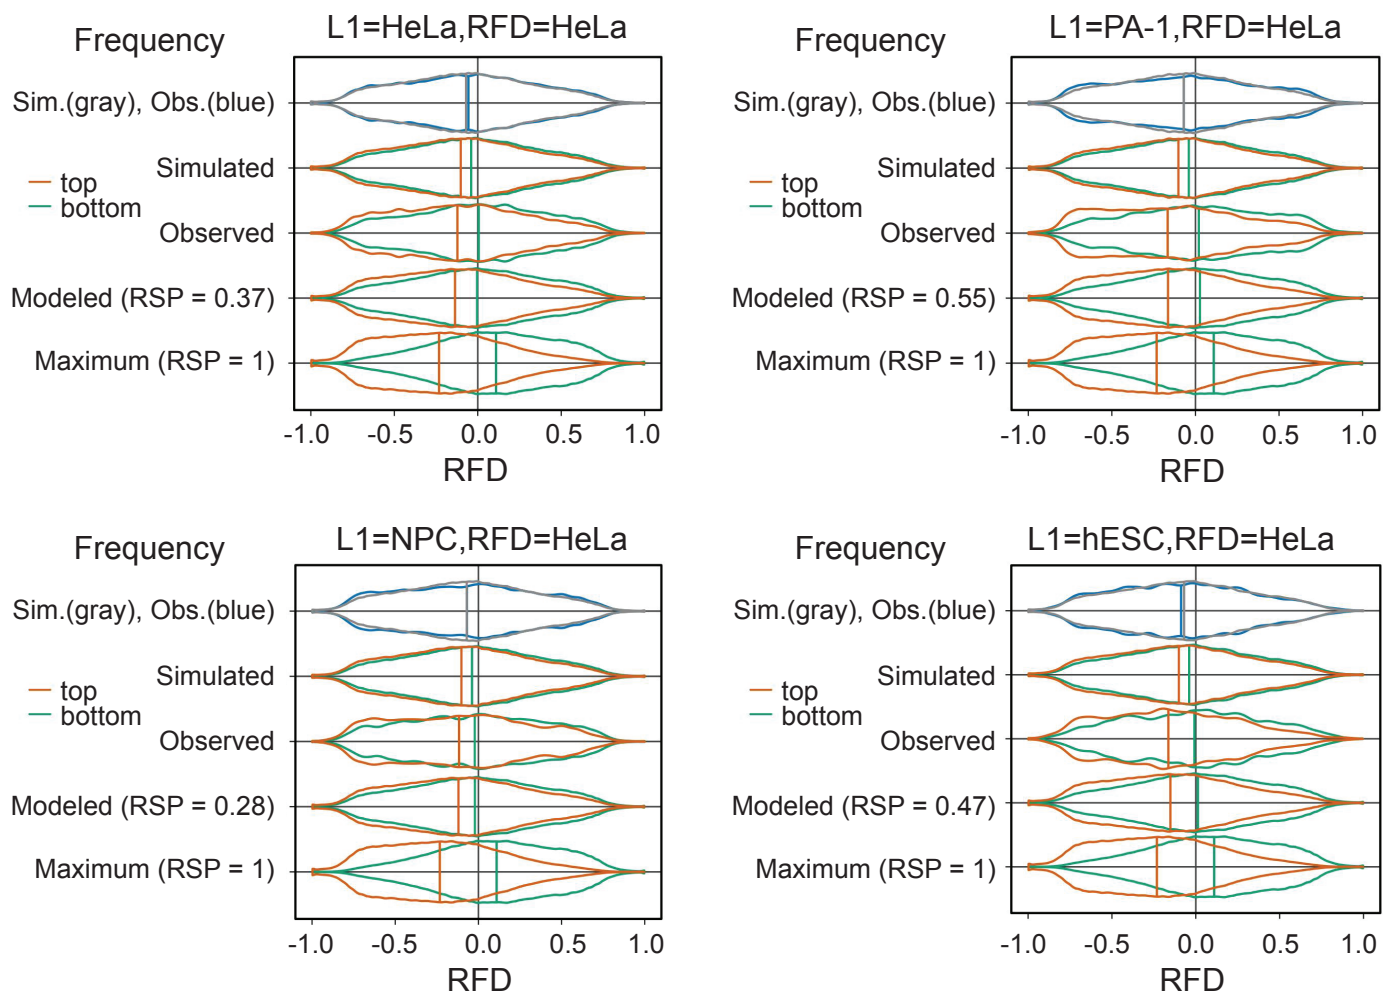**B**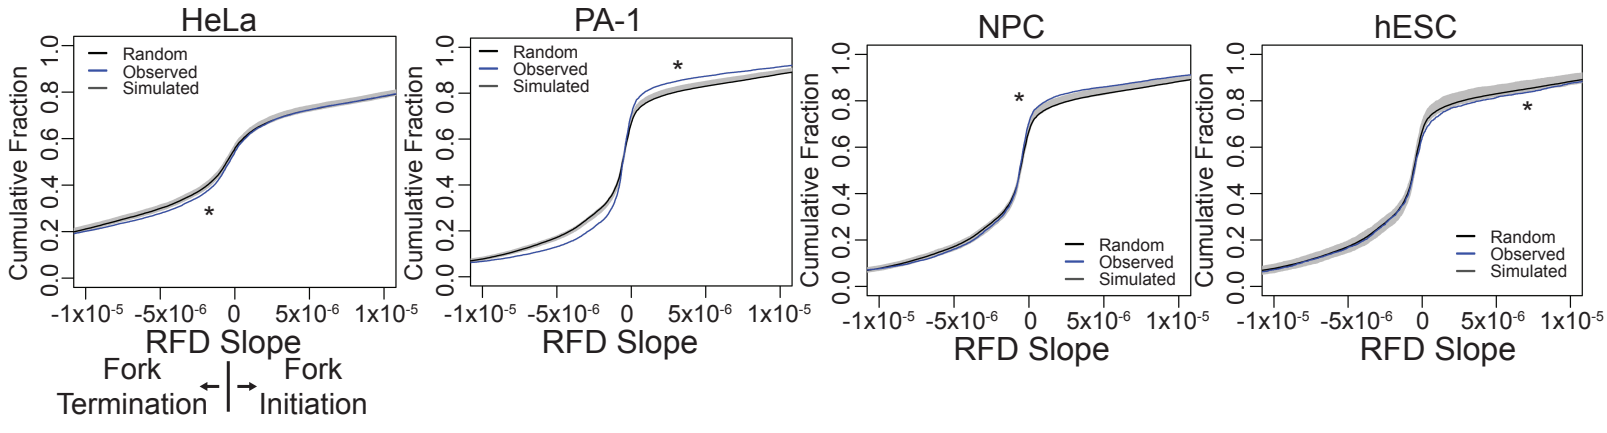**Figure S5**

Supplement: NIHMS1523125-supplement-5.pdf [file NIHMS1523125-supplement-5.pdf]

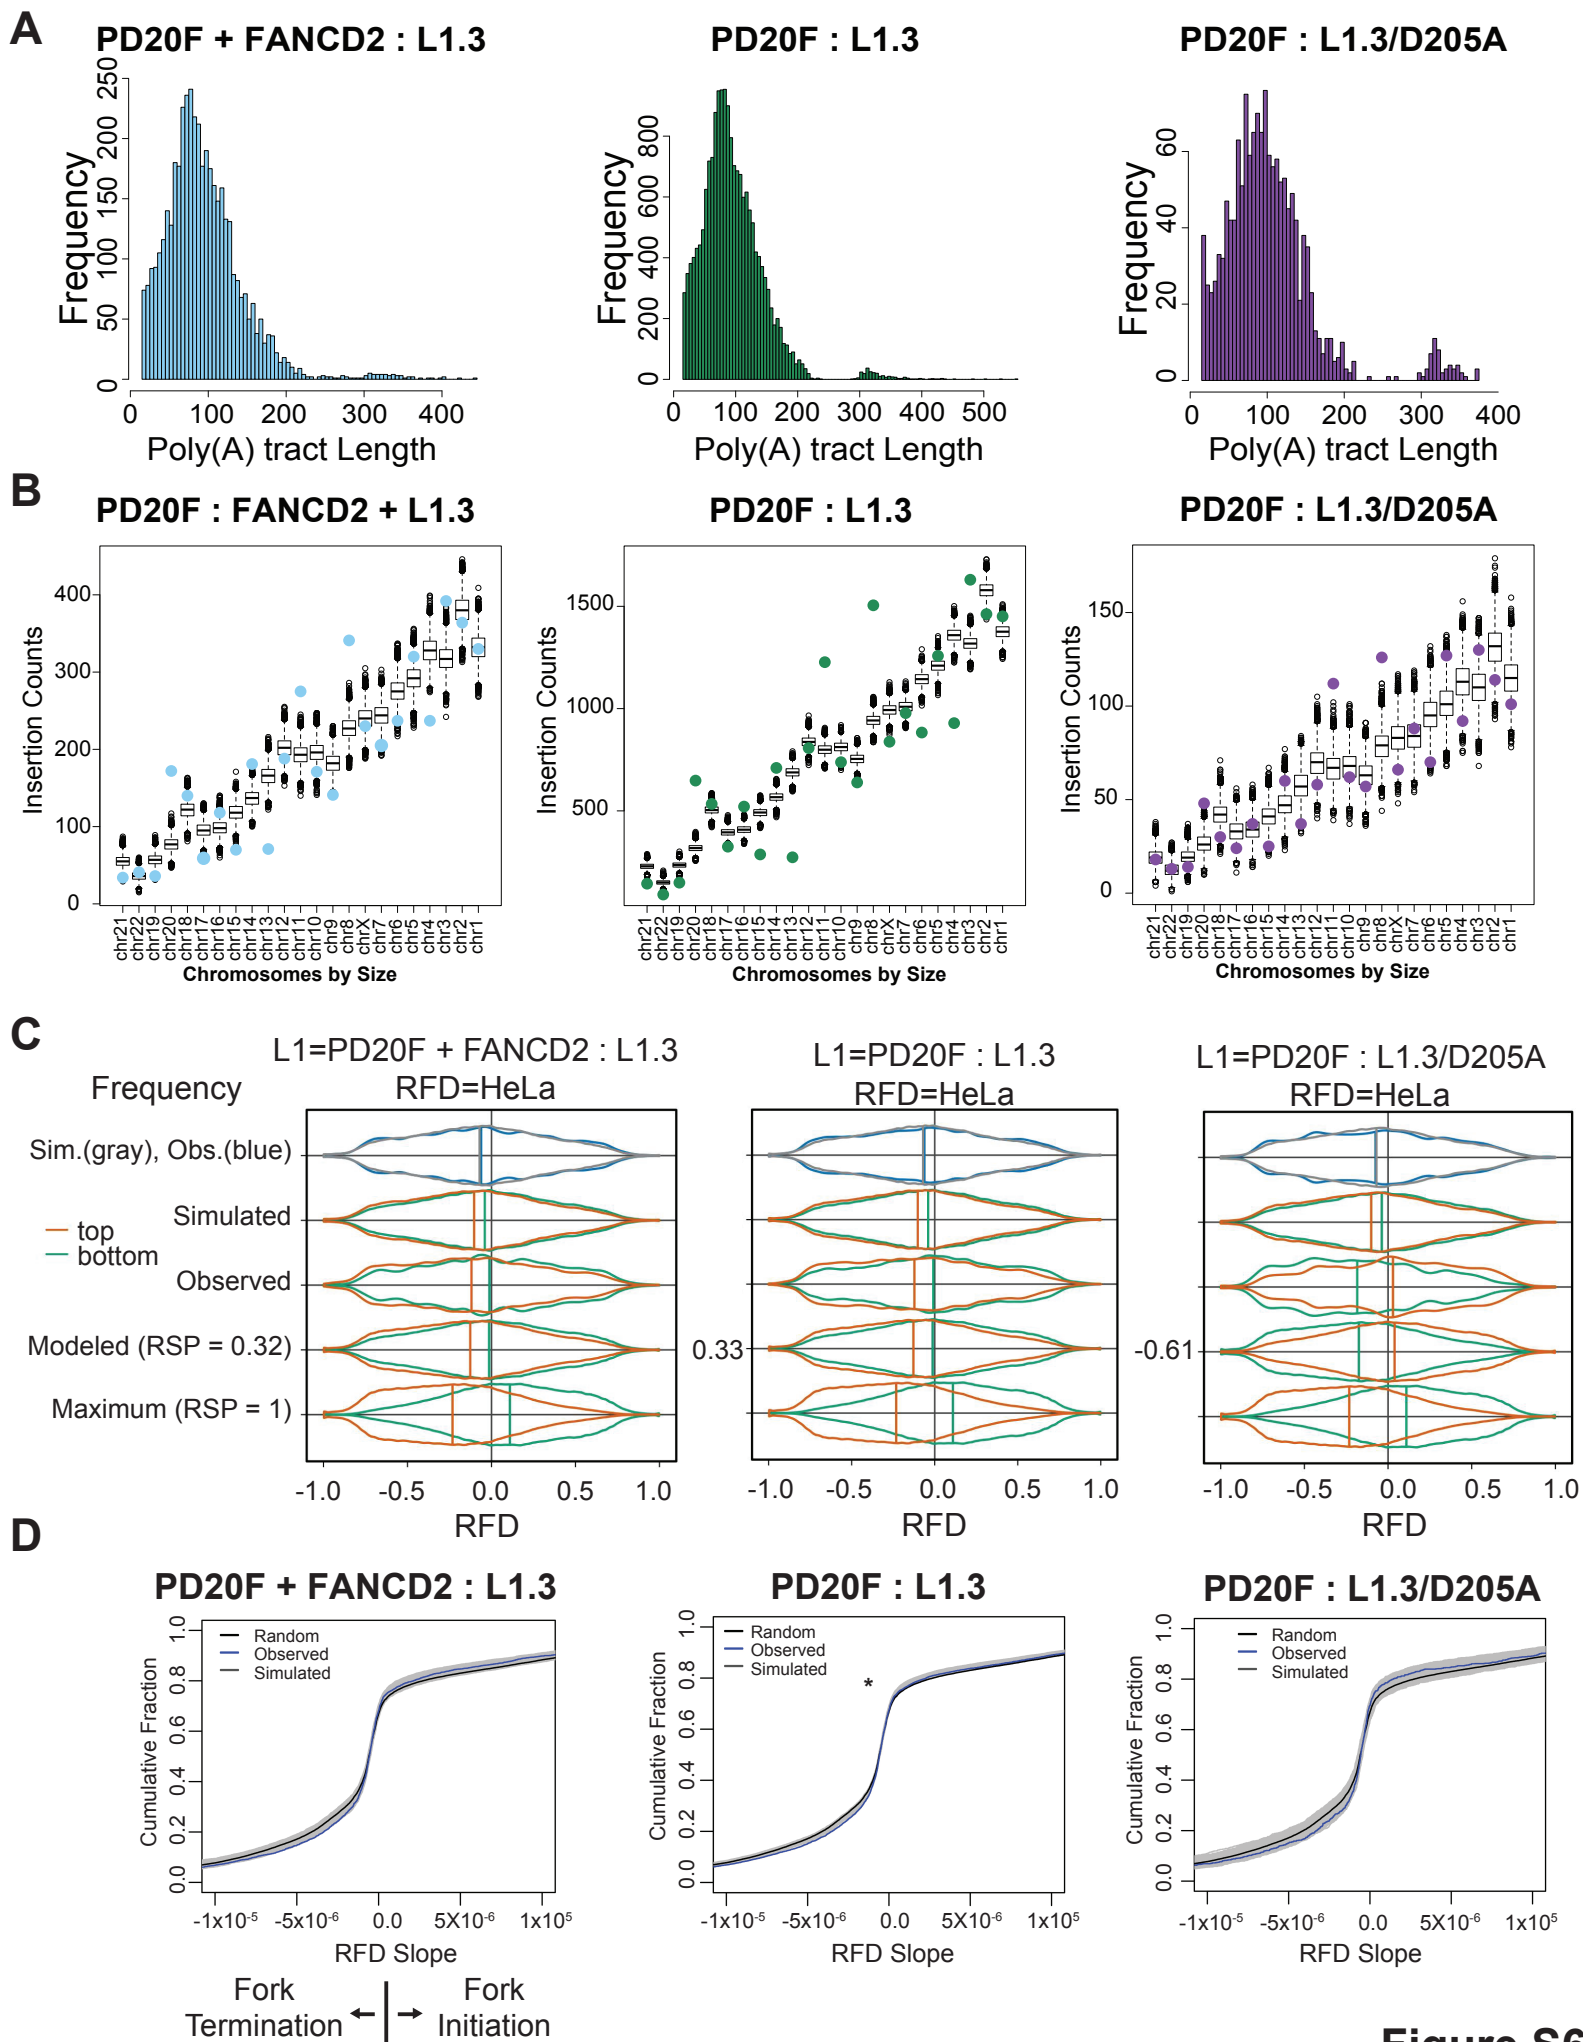

**Figure S6**

Supplement: NIHMS1523125-supplement-6.pdf [file NIHMS1523125-supplement-6.pdf]

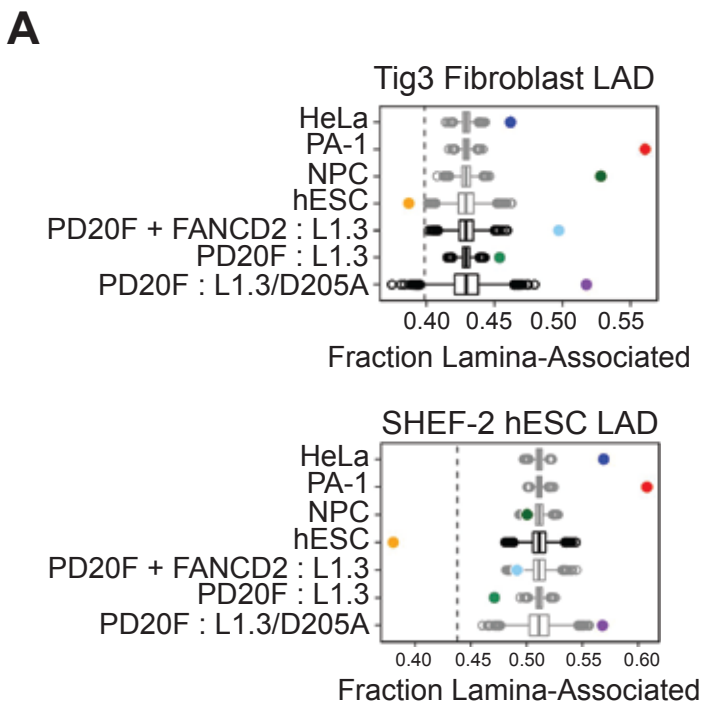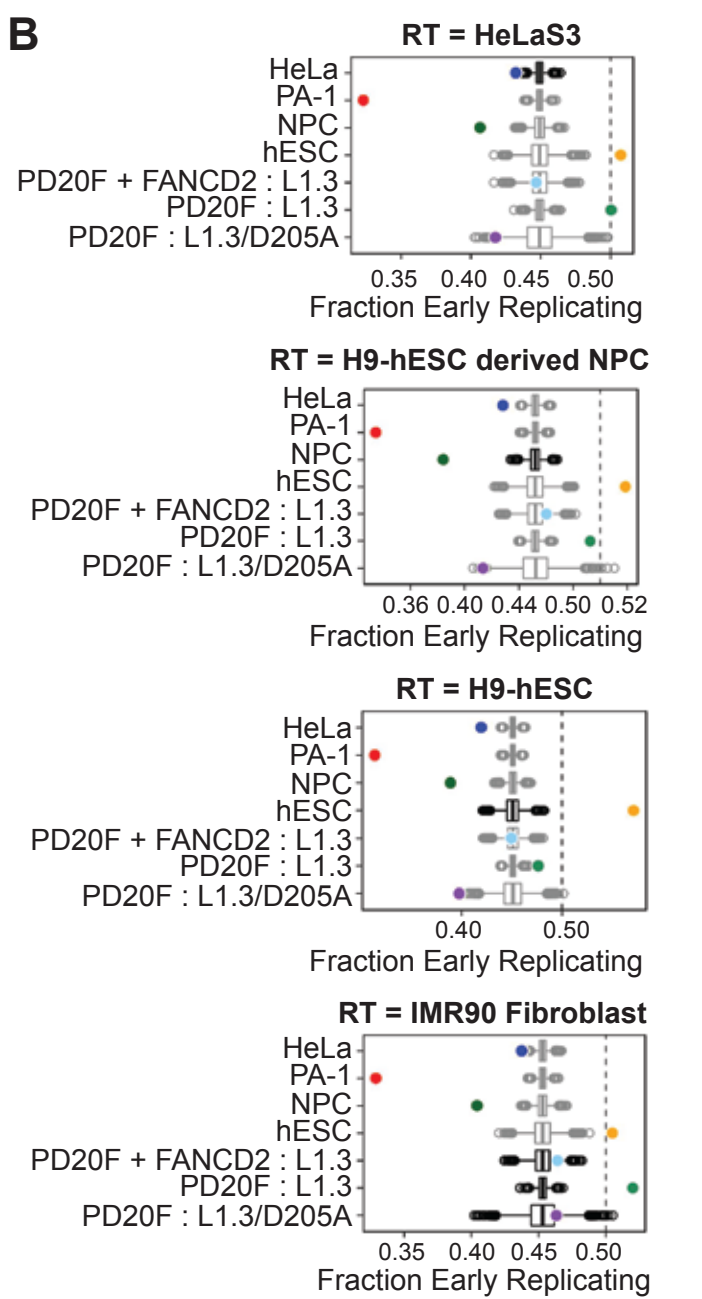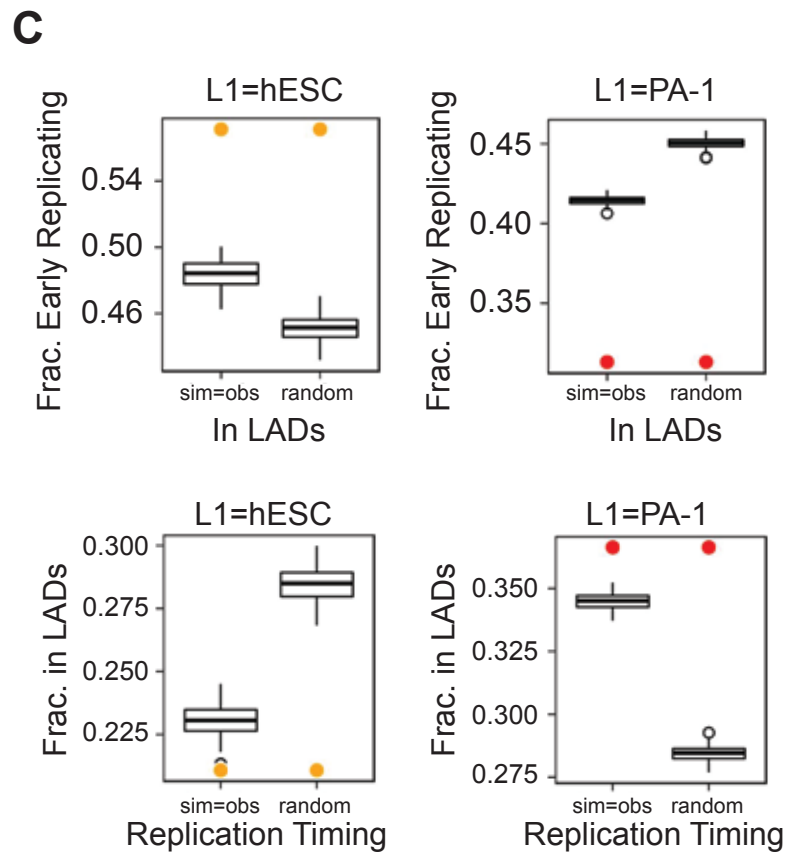

**Figure S7**

Supplement: NIHMS1523125-supplement-7.pdf [file NIHMS1523125-supplement-7.pdf]
